# Supplementary material for: Kinetic fingerprinting of metabotropic glutamate receptors
Source: PubMed Central journal article supplement (PMC9883448; doi:10.1038/s42003-023-04468-z), 2023-01-27
Supplement: 42003_2023_4468_MOESM2_ESM.pdf [file 42003_2023_4468_MOESM2_ESM.pdf]

## Description of Additional Supplementary Files

**File name:** Supplementary Data 1

**Description:** Source data for Figure 1

**File name:** Supplementary Data 2

**Description:** Source data for Figure 2

**File name:** Supplementary Data 3

**Description:** Source data for Figure 3

**File name:** Supplementary Data 4

**Description:** Source data for Figure 4

**File name:** Supplementary Data 5

**Description:** Source data for Figure 5

**File name:** Supplementary Data 6

**Description:** Source data for Supplementary Figures
